# Supplementary material
Source: HighWire-hosted journal article supplement (https://erj.ersjournals.com/content/59/2/2002248)
Supplement: inline-supplementary-material-2 [file inline-supplementary-material-2.pdf]

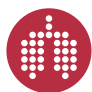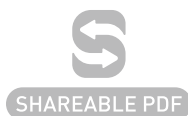

# Macrophage-derived IL-6 trans-signalling as a novel target in the pathogenesis of bronchopulmonary dysplasia

Dharmesh Hirani<sup>1,2</sup>, Cristina M. Alvira<sup>3</sup>, Soula Danopoulos<sup>4</sup>, Carlos Milla<sup>3</sup>, Michele Donato<sup>5</sup>, Lu Tian<sup>6</sup>, Jasmine Mohr<sup>1,2</sup>, Katharina Dinger<sup>1,2</sup>, Christina Vohlen<sup>1,7</sup>, Jaco Selle<sup>1</sup>, Silke v. Koningsbruggen-Rietschel<sup>7</sup>, Verena Barbarino<sup>8</sup>, Christian Pallasch<sup>8</sup>, Stefan Rose-John<sup>9</sup>, Margarete Odenthal<sup>10</sup>, Gloria S. Pryhuber<sup>11</sup>, Siavash Mansouri<sup>12</sup>, Rajkumar Savai<sup>12,13</sup>, Werner Seeger<sup>12,13</sup>, Purvesh Khatri<sup>5</sup>, Denise Al Alam<sup>14</sup>, Jörg Dötsch<sup>7</sup> and Miguel A. Alejandre Alcazar<sup>1,2,13,14</sup>

<sup>1</sup>University of Cologne, Faculty of Medicine and University Hospital Cologne, Translational Experimental Pediatrics - Experimental Pulmonology, Dept of Pediatric and Adolescent Medicine, Cologne, Germany. <sup>2</sup>University of Cologne, Faculty of Medicine and University Hospital Cologne, Center for Molecular Medicine Cologne (CMC), Cologne, Germany. <sup>3</sup>Dept of Pediatrics, Stanford University School of Medicine, Stanford, CA, USA. <sup>4</sup>Lundquist Institute for Biomedical Innovation at Harbor-UCLA Medical Center, Torrance, CA, USA. <sup>5</sup>Biomedical Informatics Research-Institute for Immunity, Transplantation, and Infection, Stanford University, Stanford, CA, USA. <sup>6</sup>Dept of Biomedical Data Science, Stanford University, Stanford, CA, USA. <sup>7</sup>University of Cologne, Faculty of Medicine and University Hospital Cologne, Dept of Pediatric and Adolescent Medicine, Cologne, Germany. <sup>8</sup>Dept of Internal Medicine, Center for Integrated Oncology (CIO) Köln-Bonn, University of Cologne, Cologne, Germany. <sup>9</sup>Institute of Biochemistry, Christian-Albrechts-University Kiel, Kiel, Germany. <sup>10</sup>University of Cologne, Faculty of Medicine and University Hospital Cologne, Institute for Pathology, Cologne, Germany. <sup>11</sup>Division of Neonatology, Dept of Pediatrics, University of Rochester Medical Center, Rochester, NY, USA. <sup>12</sup>Dept of Lung Development and Remodeling, Max-Planck-Institute for Heart and Lung Research, Member of the German Center for Lung Research (DZL), Bad Nauheim, Germany. <sup>13</sup>Institute for Lung Health (ILH), University of Giessen and Marburg Lung Center (UGMLC), Member of the German Center for Lung Research (DZL), Giessen, Germany. <sup>14</sup>University of Cologne, Faculty of Medicine and University Hospital Cologne, Cologne Excellence Cluster on Stress Responses in Aging-associated Diseases (CECAD), Cologne, Germany.

Corresponding author: Miguel Alejandre Alcázar ([miguel.alejandre-alcazar@uk-koeln.de](mailto:miguel.alejandre-alcazar@uk-koeln.de))

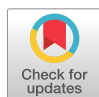

Shareable abstract (@ERSpublications)

**M1-like macrophage activation is linked to IL-6/STAT3 axis in clinical and experimental BPD. Inhibition of macrophage-related IL-6 trans-signalling promotes ATII survival and lung growth in experimental BPD as a new therapy for preterm infants.** <https://bit.ly/3AhF7GP>

**Cite this article as:** Hirani D, Alvira CM, Danopoulos S, et al. Macrophage-derived IL-6 trans-signalling as a novel target in the pathogenesis of bronchopulmonary dysplasia. *Eur Respir J* 2022; 59: 2002248 [DOI: 10.1183/13993003.02248-2020].

This single-page version can be shared freely online.

Copyright ©The authors 2022.

This version is distributed under the terms of the Creative Commons Attribution Non-Commercial Licence 4.0. For commercial reproduction rights and permissions contact [permissions@ersnet.org](mailto:permissions@ersnet.org)

Received: 12 June 2020  
Accepted: 24 June 2021

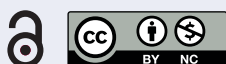

## Abstract

**Rationale** Premature infants exposed to oxygen are at risk for bronchopulmonary dysplasia (BPD), which is characterised by lung growth arrest. Inflammation is important, but the mechanisms remain elusive. Here, we investigated inflammatory pathways and therapeutic targets in severe clinical and experimental BPD.

**Methods and results** First, transcriptomic analysis with *in silico* cellular deconvolution identified a lung-intrinsic M1-like-driven cytokine pattern in newborn mice after hyperoxia. These findings were confirmed by gene expression of macrophage-regulating chemokines (*Ccl2*, *Ccl7*, *Cxcl5*) and markers (*Il6*, *Il17A*, *Mmp12*). Secondly, hyperoxia-activated interleukin 6 (IL-6)/signal transducer and activator of transcription 3 (STAT3) signalling was measured *in vivo* and related to loss of alveolar epithelial type II cells (ATII) as well as increased mesenchymal marker. *Il6* null mice exhibited preserved ATII survival, reduced myofibroblasts and improved elastic fibre assembly, thus enabling lung growth and protecting lung function. Pharmacological inhibition of global IL-6 signalling and IL-6 trans-signalling promoted alveolarisation and ATII survival after hyperoxia. Third, hyperoxia triggered M1-like polarisation, possibly via Krüppel-like factor 4; hyperoxia-conditioned medium of macrophages and IL-6-impaired ATII proliferation. Finally, clinical data demonstrated elevated macrophage-related plasma cytokines as potential

biomarkers that identify infants receiving oxygen at increased risk of developing BPD. Moreover, macrophage-derived *IL6* and active STAT3 were related to loss of epithelial cells in BPD lungs.

**Conclusion** We present a novel IL-6-mediated mechanism by which hyperoxia activates macrophages in immature lungs, impairs ATII homeostasis and disrupts elastic fibre formation, thereby inhibiting lung growth. The data provide evidence that IL-6 trans-signalling could offer an innovative pharmacological target to enable lung growth in severe neonatal chronic lung disease.
